# 1 The efficiency of dynamic regional lockdown 2 approach in controlling the COVID-19 epidemic. 3 Insights from the agent-based epidemiological 4 model for Poland

5 Jakub Zieliński<sup>1,\*</sup>, Magdalena Gruzziel-Słomka<sup>1</sup>, Jędrzej M. Nowosielski<sup>1</sup>, Rafał  
6 P. Bartzuk<sup>1,2</sup>, Karol Niedziewski<sup>1</sup>, Marcin Semeniuk<sup>1</sup>, Łukasz Górski<sup>1</sup>, Jan  
7 Kisielewski<sup>1,3</sup>, Antoni Moszyński<sup>1</sup>, Maciej Radwan<sup>1</sup>, Artur Kaczorek<sup>1</sup>, and Franciszek  
8 Rakowski<sup>1</sup>

9 <sup>1</sup>University of Warsaw, Interdisciplinary Centre for Mathematical and Computational Modelling, Warsaw, 00-927,  
10 Poland

11 <sup>2</sup>John Paul II Catholic University of Lublin, Institute of Psychology, Lublin, 20-950, Poland

12 <sup>3</sup>University of Białystok, Faculty of Physics, Białystok, postcode, Poland

13 \*Corresponding author [j.zielinski@icm.edu.pl](mailto:j.zielinski@icm.edu.pl)

## 14 ABSTRACT

15 In this work properties of the dynamic regional lockdown approach to suppress the COVID-19 epidemic spread in Poland were investigated. In particular, an agent based model was used with the aim to indicate an optimal lockdown strategy, defined here as the one which minimizes mean lockdown time over regional unit provided health service is not overwhelmed. With this approach the lockdown extent was also considered by varying restrictions between complete regional school closure and/or significant social distancing in semi-public spaces. In result, a cooperative effect was discovered in the case when closure of schools was accompanied by severe restrictions of social contacts in semi-public spaces. Moreover, the regional lockdown approach implemented here on the level of counties (units of population around 100k) proofed to be successful, that is allowed to identify optimal entrance and release thresholds for lockdown. The authors believe that until significant portion of population is vaccinated such a strategy might be applied.

## 16 Introduction

17 The COVID-19 epidemic, which probably started at the turn of 2019 and 2020, unfortunately does not end. Although there are  
18 a few approved vaccines, vaccine supply remains an unresolved challenge. Moreover, some people refuse to be vaccinated for  
19 various reasons. Due to the high infectivity of the SARS-CoV-2 virus and a large percentage of people with asymptomatic  
20 course of illness (and therefore difficult to detect), the effective suppression of the disease requires use of drastic solutions, such  
21 as lockdown or common quarantines. The consequences of these actions are dramatic for the economy, and it seems that many  
22 countries will not be able to re-apply full lockdown due to the economic consequences.

23 It is therefore essential to look for the solutions that can help suppress the epidemic while reducing negative social effects.  
24 It seems that most countries will have to implement some form of smart lockdowns - they must be strong enough to prevent  
25 a sharp increase in number of infections, and weak enough not to cause a significant increase of unemployment. One of the  
26 proposed solutions is a regional dynamic lockdown strategy. In essence, it comes down to the application of strong restrictions  
27 in regions particularly strongly affected by the pandemic. After the number of infected decreases, restrictions should be relaxed  
28 in a given region.

29 However, managing a regional dynamic lockdown strategy is difficult. It requires the adoption of closing and opening  
30 criteria. It seems advisable to avoid both temporal oscillations (alternating switching on and off of lockdowns), and excessive  
31 mixing of closed areas with unrestricted ones — a checkerboard pattern. In order to understand inner workings of dynamic  
32 regional restrictions we use a massive agent based model (ABM) initially developed for the Polish population<sup>1</sup> and equipped  
33 with a number of extensions tailored for specific characteristics of COVID-19. The model not only allows to predict the  
34 total number of cases, but also gives the information on the spatial and age distributions of infections. Model also tries to  
35 approximate the contact matrix (age of the infected person according to the age of the person who bans) or the circumstances of

36 the infection (school, home, public transport, etc.). For the present study, we have initially tested the effectiveness of dynamic  
37 regional restricting social activity strategies with just school closures. Schools closure is a commonly used strategy to control  
38 the COVID-19 epidemic. At the peak of global schools lockdowns caused by COVID-19 (2 April 2020), 172 nations had  
39 enacted full closures or partial dismissals, affecting nearly 1.5 billion children<sup>2</sup>. This type of intervention is relatively simple to  
40 manage. Most often, the closure of schools depends on an administrative decision and, to a relatively small extent, depends on  
41 the social willingness to comply with it. Moreover, the current comparisons of strategies applied in the fight against COVID-19  
42 showed a high position of school closures in the ranking of the effectiveness of non-pharmaceutical measures<sup>3</sup>.

43 In an epidemic situation, in the absence of empirical data, epidemiological models can help to evaluate the impact of  
44 interventions on transmission, and can be used as important tools to identify effective policies for appropriate measures  
45 to enact<sup>4-8</sup>. Based on model calculations, closure of schools was considered an effective strategy to contain epidemic of  
46 influenza<sup>9-13</sup> and measles<sup>14</sup>, because of high contact rates among children and adolescents as well as high susceptibility to  
47 these viruses. The results of agent-based modeling of the impact of school closings on the COVID-19 epidemic in Ontario,  
48 Canada, showed that school closings may have a limited effect in reducing the burden of the disease without other measures to  
49 disrupt the transmission chain (as community-based voluntary self-isolation)<sup>15</sup>. Other works also confirmed the importance of  
50 introducing other measures alongside school closure, for example, related to the reduction of contacts in the workplace<sup>5,6</sup>.

51 Similarly, our results for Poland show that dynamic regional school closing alone cannot be both short in time and  
52 sufficiently effective to prevent the overload of health service. Therefore, we also consider regional and dynamic restriction on  
53 social activity in semi-public spaces (the "street" context in our model, apart from streets it covers also public and commercial  
54 services, shops etc., the "street" context does not cover schools and nurseries). Although the latter appears to be even less  
55 effective than school closing alone, we find a cooperative effect when the two contexts are locked. The effect is significant  
56 enough to make the strategy of regional dynamic restrictions imposed both on semi-public spaces and schools an attractive  
57 approach for the state authorities.

58 The above result is particularly important in the face of negative consequences brought by a long-term distance learning  
59 period. Not only educational, and emotional damages among children should be mentioned here, but also the secondary  
60 economic losses caused by the need for child care.

## 61 Aim of the study

62 The aim of this study is twofold. Firstly, to test whether and to what extent the dynamic, regional lockdown approach is capable  
63 of suppressing the COVID-19 epidemic spread in Poland. This part of the study is done by performing number of agent-based  
64 simulations with various lockdown entrance, and release thresholds. The thresholds are derived from the number of infections,  
65 and imposed on the level of counties. Also, each series of simulations is computed for three levels of possible lockdown  
66 stringency. Secondly, provided the approach turns out successful, further analysis of simulation results aims at determining the  
67 optimal strategy of regional lockdowns. Namely, the goal is to minimize the lockdown time (averaged over counties) with a  
68 constraint to the maximum allowed occupancy of ICUs (intensive care units). For this purpose, an arbitrarily chosen critical  
69 value is assumed, corresponding to 90% of Polish public health service capacity. Since estimated ICU capacity in Poland is  
70 around 3000 (about 8 per 100 000 inhabitants), the critical value is set at  $7.2 \text{ per } 10^5$  inhabitants.

## 71 Results

72 The following sections aim at describing the impact of school closures accompanied by restricted public places („street”)  
73 contacts on the epidemic outcome. The epidemic simulation was based on actual data until August 30, 2020. Based on data  
74 from September 2020, when schools were open in Poland, the model parameters controlling the probability of infection in  
75 schools were estimated. The beginning of the school year in Poland takes place on September 1, and from that day on, the  
76 strategies of dynamic school lockdowns (excluding kindergartens) were implemented with a county resolution. A county (*pol.*  
77 *powiat*) is an intermediate administrative unit in Poland and data on the development of the epidemic are collected at the county  
78 level.

79 There are two main parameters in the dynamic regional lockdown approach (DRLA) described in this work - the entrance  
80 and the release lockdown thresholds. These thresholds are given as the numbers of detected infected agents within two weeks  
81 period per  $10^4$  agents in a county. We consider several entrance and release threshold values: 2, 4, 6, 8, 10, 12, 18, and 24 under  
82 the condition that the release threshold is less or equal than the entrance one. New cases were counted in a two-week window  
83 to avoid simple statistical fluctuations and weekly oscillations in reporting data related to the weekends. The threshold criteria  
84 were checked daily. The simulations were conducted for one school year but analyzed in detail for the first semester only.

85 For a reference, three additional simulations were run with countrywide restrictions being applied throughout the whole  
86 simulation: only school closure applied, only restricted street contacts applied, and both applied together.

87

88 To assess the impact of the applied restrictions, and to understand the epidemic scenarios themselves, several typical  
 89 indices will be used, see Figure 1. Crucial parameters for our purpose are those that directly describe the burden of epidemic  
 90 either on health system service - e.g. the interval when majority of available ICU beds are occupied or economy - e.g. the  
 91 length of the lockdown interval. An attack rate does not seem to be an essential criterion for decision making on lockdown  
 92 introduction, taking into account that majority of cases are asymptomatic or have a mild course of infection. However, it carries  
 93 the information on the level of immunity in the society, assuming the recovered agents become immune.

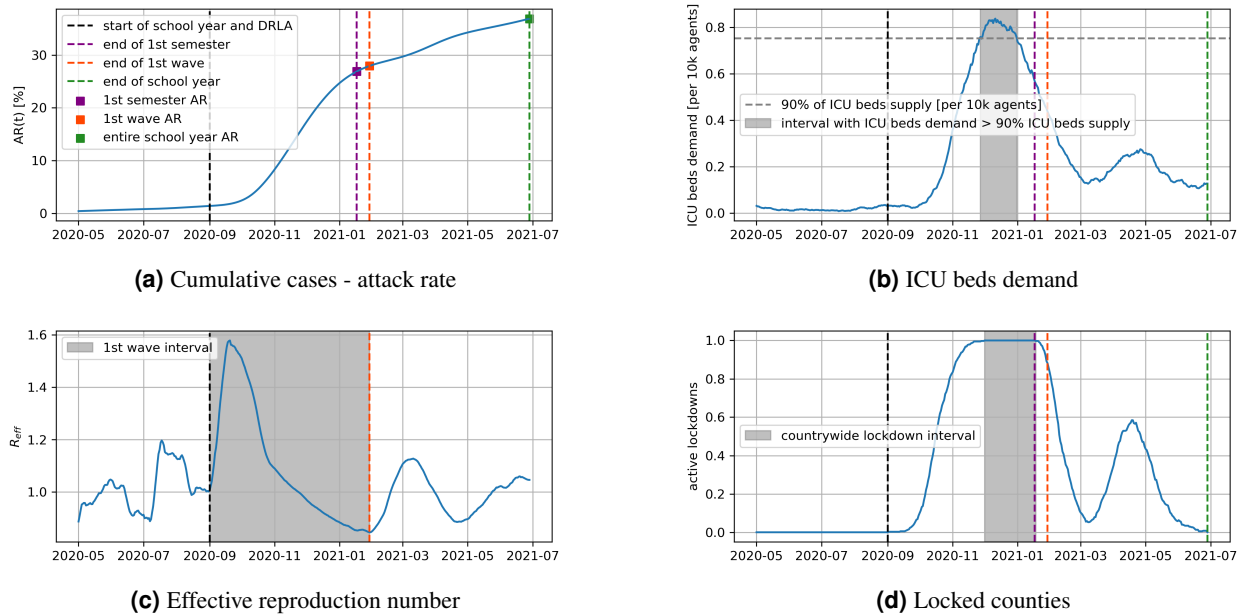

**Figure 1.** Example results - from simulation with entrance and release threshold values equal 12 and 10, respectively - describing the indices used in this paper: the attack rate during the first semester, the first wave, or the entire school year, Figure 1a; the interval over which the demand for ICU beds exceeded 90% of the supply, Figure 1b; the interval of the first wave defined via  $R_{eff}$ , Figure 1c; the interval of a full - countrywide - lockdown, Figure 1d. The vertical, dashed lines mark the start (black, dashed) or the ends of certain intervals described in the legend of Figure 1a

## 94 The impact of lockdown entrance threshold

95 In this section, we consider the effect of lockdown entrance threshold (LET) on ICU overload time, and attack rate.

96 The attack rate till Dec., 3rd (see Figure 2a) strongly depends on LET for simulations with school closure applied (diamonds)  
 97 or with school closure accompanied by restriction imposed on public spaces (squares). On the other hand, it weakly depends on  
 98 LET for simulations with public spaces restricted (circles). One can observe almost 4-fold increase in the attack rate between  
 99 simulations with LET 2 and 24 and both contexts restricted, and about 2.5-fold increase in simulations with only schools closed.

100 Clearly, the higher the lockdown entrance threshold value, the later lockdown is reached. This applies to both individual  
 101 counties, and nationwide lockdown - the state in which the entry threshold has been exceeded in all counties. What may  
 102 seem a bit surprising, the difference in the time of reaching the national lockdown for LET = 4 and LET = 24 is only 3 weeks,  
 103 regardless of the strength of the lockdown, see Figure 2b. This is a consequence of the exponential nature of the epidemic and  
 104 its suppression by regional lockdowns. However, for a very high entry threshold, national lockdown may occur later than the  
 105 ICU overcapacity. This would lead to mass deaths due to lack of available care. Thus, the introduction of a strong national  
 106 lockdown would be almost certain, regardless of earlier assumptions made by the government.

107 As one can see, closing of schools reduces the number of infections much more than closing of the street context (public  
 108 places). This is due to the large number of households in Poland where three generations live together. This means that children  
 109 who are infected at school and often pass infection asymptotically, infect a significant number of household members.  
 110 Moreover, classes in Poland are slightly overcrowded - e.g. in large cities there are about 25 children in the class. On the other  
 111 hand, in Poland, contrary to the countries of southern Europe, regular visits to restaurants, cafes, etc. are relatively unpopular. It  
 112 must be noted, however, that the impact of the lockdown imposed on public spaces is much stronger when it accompanies  
 113 school closure. The relationship between the effects of school closure and restrictions imposed on public spaces is thus country

It is made available under a [CC-BY-ND 4.0 International license](https://creativecommons.org/licenses/by-nd/4.0/).

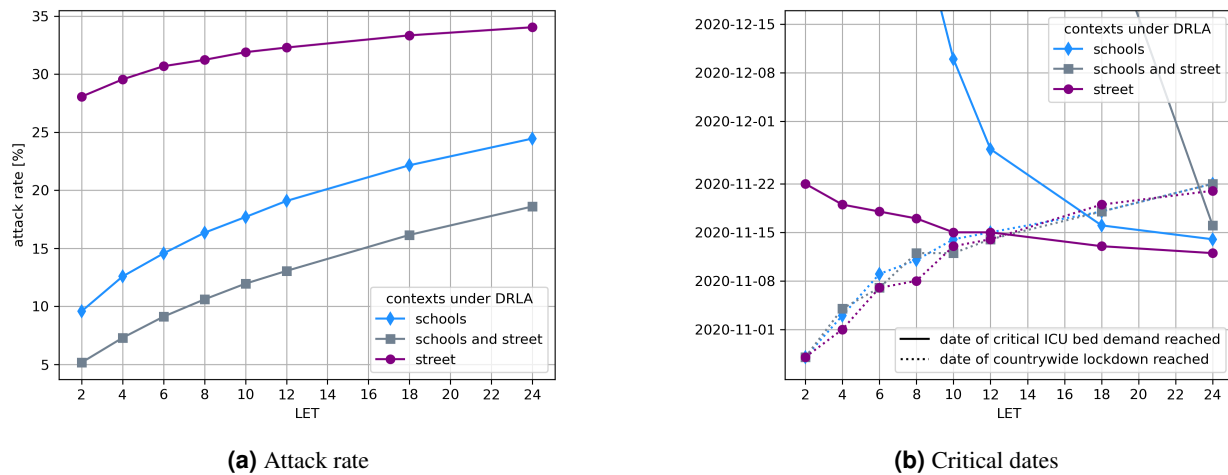

**Figure 2.** The lockdown entrance threshold dependent attack rate till Dec., 3rd, Figure 2a, and critical dates, Figure 2b. Both figures present the results for three lockdown definitions (street restricted - purple circles and lines, schools closed - blue diamonds and lines, both contexts restricted - grey squares and lines). The critical dates in Figure 2b are represented here by the day when critical ICU bed demand was reached (solid lines), and the day when nationwide lockdown was reached (dotted lines).

114 dependent. However, the relationship between attack rate and LET should be universal. The higher the LET, the higher the  
 115 attack rate. Furthermore the stronger the lockdown is, the more attack rate depends on the LET.

116 **Consecutive waves. Effective R and Lockdown Release Threshold**

117 As a result of lockdown and achieved herd immunity, number of infections is reduced. The timing of the lockdown completion  
 118 depends on lockdown release threshold (LRT). Of course, release of lockdown could lead to a new wave of infections. When  
 119 multiple epidemic waves occur, it is necessary to define a boundary between them. In this paper, as the beginning of a new wave,  
 120 we assume the moment when effective reproduction number  $R_{eff}$  starts to rise. Therefore, in order to observe the occurrence of  
 121 successive waves over time, it is convenient to look at the graph showing the variability of  $R_{eff}$ .

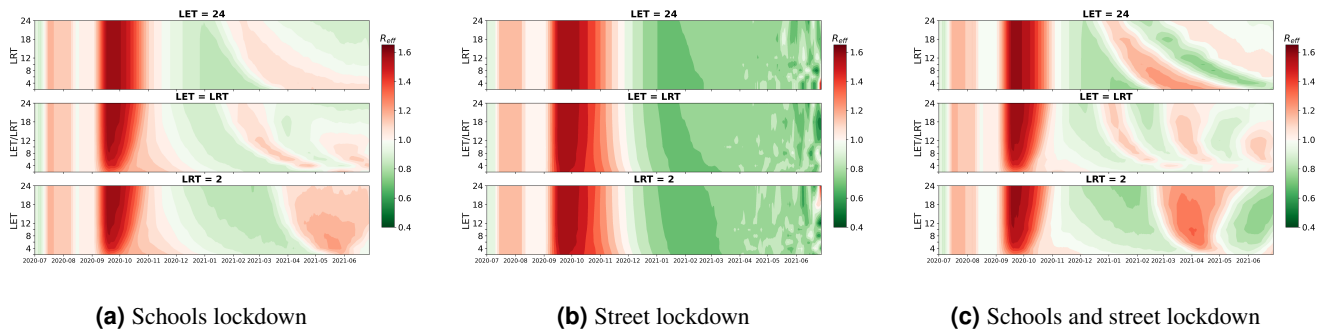

**Figure 3.** Change of effective reproduction number,  $R_{eff}$ , in time for various combinations of LET and LRT thresholds. Panels in each figure correspond to: LRT dependent  $R_{eff}(t)$  for LET=24 (top), LET dependent  $R_{eff}(t)$  for LRT=2 (bottom), and  $R_{eff}(t)$  for LET=LRT (middle).

122 As one may notice (see Figure 3), both LET and LRT strongly influence the times of the beginning and end of successive  
 123 waves of epidemics. A stronger lockdown means a greater risk of next epidemic waves coming soon. Someone might consider  
 124 this a disadvantage of strong lockdown or an advantage of a weak one. However, this is an apparent benefit resulting from the  
 125 ineffectiveness of a weak lockdown. Weak lockdown, as well as its absence, lead to a high  $R_{eff}$  value, long first wave and a  
 126 large number of infections in short time, and thus unacceptably many deaths.

127 As one can see, in the case of a strong lockdown, especially for a high LET value, the occurrence times of subsequent

epidemic waves strongly depend on the LRT. This means that the times when the first wave ends, and the next waves occur depend on government decisions. On the other hand, governments have no influence on the starting time of the first wave. Moreover, as shown in the previous section, the choice of particular LET can shift the beginning of the first lockdown just by few weeks.

### Searching for an optimal lockdown strategy.

In many countries, completely different lockdown strategies have been chosen, which means that choosing the optimal one is not easy. On the one hand, we all know that too long lockdowns are socially unacceptable. On the other hand, the capacity of health systems must not be exceeded. These needs seem contradictory.

In order to find the optimal lockdown strategy, we ran the model with different LET and LRT threshold values. The simulation results are presented on Fig. 4. As one can see, in the case of a weak lockdown (just closing public places or schools only, see Fig. 4a, 4b) there is a strong correlation between the total lockdown time (background shades) and the time when ICUs are overcrowded (quares color). Both ICU overcrowding time duration of lockdowns strongly depend on LET and quite weakly on LRT. Therefore, the application of weak lockdowns does not allow avoiding the dilemma: economic losses vs a large number of deaths.

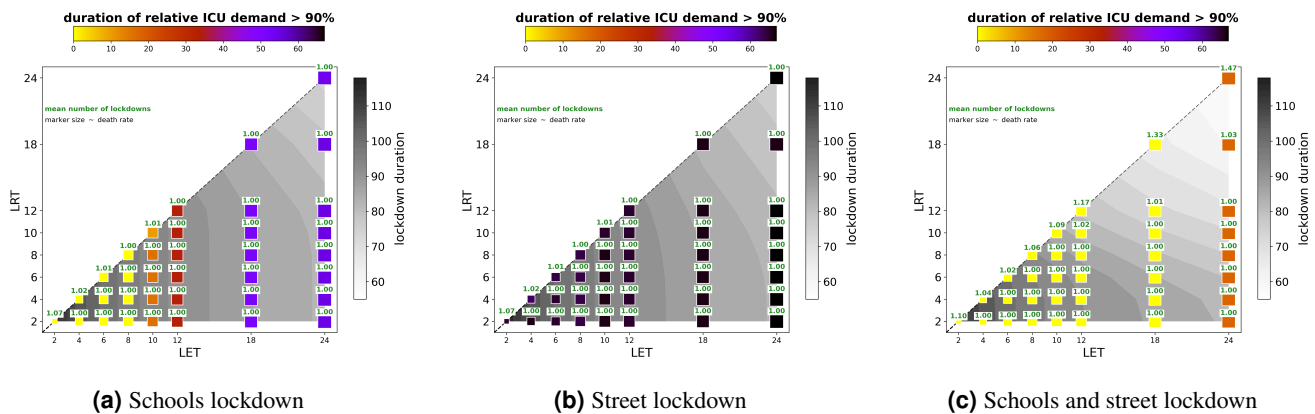

**Figure 4.** Various indices dependent on LET and LRT values: grey scale contours correspond to the mean (over counties) lockdown duration in days, marker colors (horizontal colorbar) correspond to the duration of period when relative ICU bed demand exceeded 90% of ICU bed supply (in days). Numbers above markers (green font) give the mean (over counties) number of lockdown events, and finally marker size roughly corresponds to death rate. All indices were calculated for 1st semester interval.

Fig. 4c shows the effect of applying a strong lockdown. Obviously, the lockdown time is shorter, as is the ICU overload time. Of course, this is not surprising. However, in a strong lockdown, increasing the LRT significantly shortens the lockdown time, leaving the ICU overcapacity time almost unchanged. This is a very different situation from a case with a weak lockdown imposed. For example, for LET = 18, increasing the LRT from 2 to 18 reduces the total lockdown duration by approximately two weeks. The most serious consequence is increasing the average number of lockdowns in the county from 1 to 1.33. This means that some poviats will have to apply a repeated, short lockdown. The cost seems low.

### More detailed analysis of lockdowns

An important feature of the proposed scheme is the regionalization of lockdowns, as it allows to prevent the introduction of civil restrictions where and when they are not necessary. Therefore, the transition of regional lockdowns into a countrywide lockdown, i.e. the situation of closing all counties, is in a sense a failure of the proposed strategy. The Fig. 5 shows the time of the countrywide lockdown in relation to the average time of closing individual poviats. As one can see, only in the case of a strong lockdown and high thresholds, countrywide lockdown does not occur (Fig. 5c).

Finally, we analyzed the sensitivity of the proposed strategy to the threshold values. The green bar in Fig. 6 shows the relative ICU demand as a function of time for different thresholds. A wide bar at a given moment in time means that the number of people needing the ventilator is highly sensitive to the LRT and LET values. This is important as the threshold values for critical ICU demand can vary significantly between countries. As can be seen, in Fig. 6c, in the case of a strong regional lockdown (both schools and public places - streets are closed), it is possible to maintain the number of occupied respirators at an acceptable level, regardless of the adopted, reasonable LET and LRT values. On the other hand, a removal of a



It is made available under a [CC-BY-ND 4.0 International license](https://creativecommons.org/licenses/by-nd/4.0/).

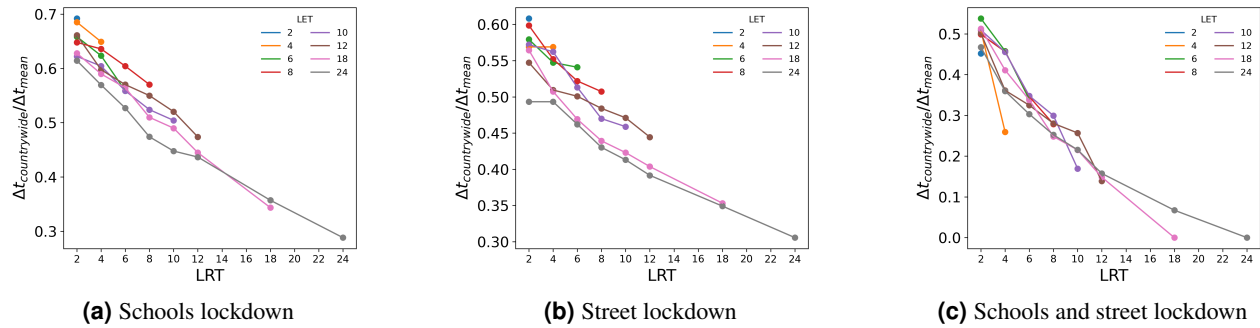

**Figure 5.** The ratio of countrywide lockdown interval to mean (over counties) lockdown interval. The high value of this coefficient is associated with the failure of the regional lockdown strategy.

160 strong, countrywide lockdown threatens with the next wave of an epidemic. In this case/In such a case, a countrywide moderate  
 161 lockdown (i.e. in this work, school closure only) appears to be a reasonable alternative.

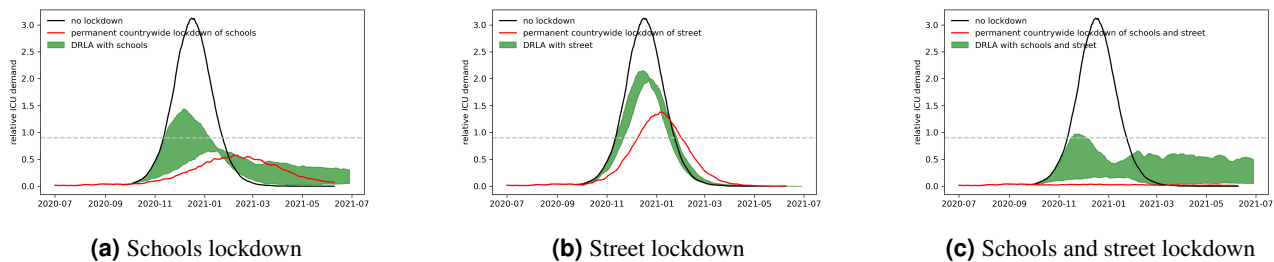

**Figure 6.** Comparison of time dependent relative ICU demand for all scenarios with DRLA on selected contexts (shaded green region), with scenario of countrywide permanent lockdown of these contexts (red line), and with scenario with no lockdown applied (black line). Shaded region marks the bounds between minimum and maximum values obtained in all DRLA scenarios (with selected contexts restricted). Dashed horizontal line marks the critical ICU bed demand.

## 162 Discussion and summary

163 The experience of many Asian countries and, among others, New Zealand, which managed to suppress the SARS-Cov-2 virus  
 164 epidemic, show that the most effective method of fighting this virus is a very strong lockdown or contact tracing and mass  
 165 testing. Unfortunately, such a strategy has not been implemented in most European and American countries. Usually, there  
 166 are cultural and legal reasons that impede the introduction of absolute lockdowns and tracking citizens' contacts. Testing was  
 167 limited by economic factors and the lack of availability of a large number of tests. The huge number of infections in India and  
 168 Brazil shows the scale of the vaccine shortage. Therefore, for many countries, a different, realistic strategy is needed.

169 For economic and social reasons, governments are defending themselves against ordering strong and long lockdowns. It is  
 170 obvious to most people that the more costly (economically and socially) lockdown is, the more effective it is. So a dilemma  
 171 arises whether to sacrifice people's lives or the economy and, among others, the psyche of children. In this study we have shown  
 172 that a possible strong, regional and short lockdown allows governments to avoid the above dilemma. Strong lockdown, even if  
 173 it does not eradicate the epidemic, may suppress it enough to allow for the lockdown release. Of course, a strong lockdown  
 174 itself has many unpleasant consequences. Therefore, it is crucial to avoid introducing lockdowns when and where they are not  
 175 necessary. Therefore, they should be introduced and lifted at the appropriate moment and only in parts of the country where it  
 176 is necessary. In our opinion, the strategy is the optimal method of epidemic management until the population is vaccinated.

## 177 Methods

178 This section briefly describes the agent-based model used in this paper.

## Model description

The results presented in this work were obtained with the usage of an agent based model. Initially, the model was developed to explain influenza epidemic in Poland<sup>1</sup>. Similarly to influenza, Covid-19 is an infectious airborne disease. In order to adapt the model for simulation of the Covid-19 epidemic spread a number of modifications, and new features were introduced.

Epidemic spread takes place within the virtual society of Poland<sup>16</sup>. The virtual society consists of 36 million geo-referenced software agents. Agents meet in various contexts where they can contract the disease. Each agent is assigned to exactly one geo-referenced household context. A workplace, a preschool, a school, a university, a large university, a street, and a travel are the other context categories present in the model. Contexts are characterised by contacting rates (CRs), which are model parameters. One can therefore model the imposing and lifting of governmental restrictions by changing the CRs. Every agent attends contexts he/she belongs to, and after a full day the probability of infection for each susceptible agent is calculated. The probability, expressed simply as:

$$p_{infection} = 1 - \exp(-\alpha I) \quad (1)$$

depends on several time dependent parameters either occasionally changing, such as coefficient  $f$ , and contacting rates ( $w_c$ ) of contexts, or changing every timestep, such as context infectivities, i.e., proportion of infectious agents present in the given context. It also depends on constant parameters, i.e. transmission coefficient  $\alpha$ . Transmission coefficient  $\alpha$  is a parameter of COVID-19 itself and coefficient  $f$  describes fraction of infectious symptomatic agents who do not self-isolate despite the fact that they feel unwell.

The first important extension of the model is the introduction of asymptomatic infected agents. The motivation is to take into account COVID-19 cases which do not exhibit any (obvious) symptoms of the disease for the whole course of the infection. We assume that infectiousness of an asymptomatic agent is multiplied by parameter  $a$  (i.e.  $a = 0.1$ ) with respect to a symptomatic agent. The proportion of asymptomatic and symptomatic agents varies across agents age category. With the above, the context infectivities become:

$$I_c = \frac{fn_{c,sym} + an_{c,asym}}{n_{c,all} - (1-f)n_{c,sym}} \quad (2)$$

where  $c$  stands for a household, a workplace, a preschool, a school, a university, a large university, a street, or a travel. For a household, the  $f$  parameter is assumed to be 1. The total infectivity,  $I$ , that enters the Eq. 1 is just:

$$I = \sum w_c I_c \quad (3)$$

where  $w_c$  are the contacting rates within a given context, and the sum goes over all the contexts a given agent visited/attended during a given day.

Once infected, an agent may follow a number of possible paths over health states, see Fig. 7. Upon contagion an agent becomes latent. Next, the infected agent might enter either symptomatic or asymptomatic course of infection. For the symptomatic case, three paths of various severity are possible: the infection with light symptoms without the necessity of hospitalisation, the infection with severe symptoms calling for the hospitalisation, and finally the infection course that leads to admittance to intensive care unit (ICU).

COVID-19 is known for strong correlation between disease severity and age, which leads to the introduction of another important model extension where the probabilities of the transitions between the health states (e.g. the probability of asymptomatic infection course) depend on the agent age. These transition probabilities are gathered in Tab. 1.

There is one more important issue related to the transitions between health states, namely the time periods of the states. One should note here, that the splitting into states is already arbitrary. Based on available data, the time periods of the infection states (e.g. length of latent state - the time before the onset of symptoms/infectivity - or the hospitalization time) are described by time distributions rather than fixed values. Even these distributions probably vary with the age of infected person. However, for the simplicity, this model considers only fixed, age-independent values of health state periods, see Tab. 2. The coefficients collected in Tables 1 and 2 were defined using literature data<sup>17-19</sup> and information collected by the National Institute of Public Health based on data from Polish hospitals.

Introduction of quarantine status variable is another model extension. It allows to simulate administrative order of isolation imposed on agents with confirmed infection as well as quarantine imposed on other agents (e.g. agents who were in contact with an infected agent or agents who came back from abroad). A quarantine status variable is independent of the health state

| age range | $p_{l2a}$ | $p_{l2s}$ | $p_{s2hni}$ | $p_{s2hpi}$ | $p_{hni2d}$ | $p_{hi2d}$ | $p_{s2d}$ | $p_{hni2r}$ | $p_{hi2r}$ | $p_{s2r}$ |
|-----------|-----------|-----------|-------------|-------------|-------------|------------|-----------|-------------|------------|-----------|
| 0 - 10    | 0.95      | 0.05      | 0.01        | 0.001       | 0.08        | 0.75       | 0.001     | 0.92        | 0.25       | 0.988     |
| 10 - 20   | 0.95      | 0.05      | 0.01        | 0.001       | 0.08        | 0.75       | 0.001     | 0.92        | 0.25       | 0.988     |
| 20 - 30   | 0.95      | 0.05      | 0.012       | 0.002       | 0.08        | 0.75       | 0.001     | 0.92        | 0.25       | 0.985     |
| 30 - 40   | 0.9       | 0.1       | 0.018       | 0.003       | 0.08        | 0.75       | 0.002     | 0.92        | 0.25       | 0.977     |
| 40 - 50   | 0.9       | 0.1       | 0.035       | 0.005       | 0.08        | 0.75       | 0.002     | 0.92        | 0.25       | 0.958     |
| 50 - 60   | 0.8       | 0.2       | 0.07        | 0.01        | 0.08        | 0.75       | 0.005     | 0.92        | 0.25       | 0.915     |
| 60 - 70   | 0.77      | 0.23      | 0.2         | 0.05        | 0.08        | 0.75       | 0.02      | 0.92        | 0.25       | 0.73      |
| 70 -      | 0.52      | 0.48      | 0.25        | 0.1         | 0.08        | 0.75       | 0.03      | 0.92        | 0.25       | 0.62      |

**Table 1**

212 variable. It represents the isolation and quarantine enforced by the state authorities in contrary to coefficient  $f$  which is related  
 213 to the common sense self-isolation of the symptomatic infected agents. Given proportion of infected symptomatic agents are  
 214 placed under quarantine. This reflects the fact that majority of cases are not detected by authorities. If a given agent is placed  
 215 under quarantine his/her household members are as well. Only a fraction  $q$  of infected agents are placed under quarantine. This  
 216 reflects the fact that many cases are not detected by authorities.

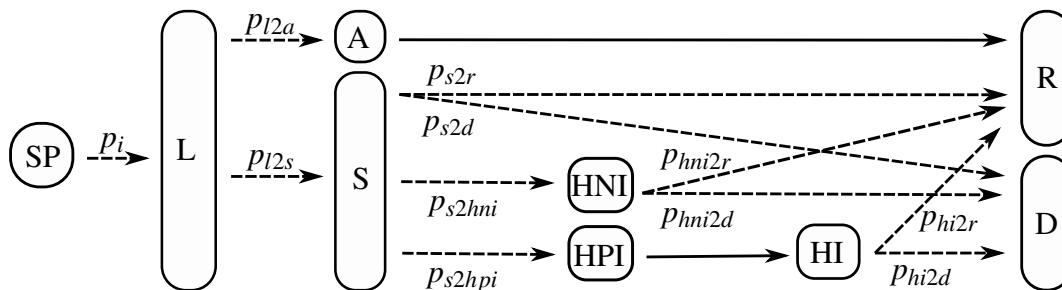

**Figure 7.** The possible paths through the course/states of illness. The state abbreviations stand for: SP - susceptible, A - asymptomatic, S - symptomatic, HPI - hospitalized, pre ICU, HI - hospitalized, at ICU, HNI - hospitalized, not at ICU, D - dead, R - recovered. There are two certain transitions (with transition probability equal 1; marked with solid arrows) regardless of the agent's age. The general probability of infection,  $p_i$  (the probability of the transition from susceptible to latent state; dashed arrow) depends on various parameters described in the text, and the probabilities of the rest of the transitions (also dashed arrows) are only age dependent, and are collected in Table 1.

| L | A | S | HNI | HPI | HI | D        | R        |
|---|---|---|-----|-----|----|----------|----------|
| 4 | 7 | 5 | 10  | 13  | 7  | $\infty$ | $\infty$ |

**Table 2**

## 217 Model calibration

218 The model calibration consists in determining the model parameter values in order to obtain consistency with the real COVID-19  
 219 epidemic spread which occurred in Poland until the end of school summer holidays, i.e., until 31st of August 2020. The main  
 220 focus of the paper is to analyse hypothetical dynamic school closures starting from 1st of September 2020. The considered  
 221 dynamic school closure policy is not directly comparable to the real epidemic course in Poland after the start of the school year.  
 222 While we are still working on formal model verification procedures, it should be noted that it was already validated against  
 223 real-world data<sup>20</sup>, in Polish-German hub<sup>21</sup>.

224 In the calibration process one can distinguish two categories of model parameters. Transmission coefficient  $\alpha$  and coefficient  
 225  $f$  were optimized using Bayesian optimization.<sup>22</sup> Finally, contacting rates in contexts were determined by expert informed trial  
 226 and error method.

227 The initial contacting rates [CR] were adopted from Rakowski et al.<sup>1</sup>. CR changes during the outbreak and subsequent  
 228 restrictions were implemented through multipliers ( $\mu_c \geq 0$ , where  $c$  represents context). Introduction of the multipliers changes  
 229 the Eq. 3 into  $I = \sum \tilde{w}_c I_c$ , with  $\tilde{w}_c = \mu_c w_c$ . In order to model changes in the CR for a particular context, we utilized the trial



230 and error method. For preschools (kindergartens,  $\mu_{KG}$ ), schools ( $\mu_{SCH}$ ), universities ( $\mu_{EU}$ ), and large universities contexts  
 231 ( $\mu_{LEU}$ ), these multipliers were estimated based on the proportion of people attending these places after introducing a given  
 232 restriction. The multipliers of long-distance traveling-related CRs (number of co-travelers -  $\mu_{COT}$ , probability to travel -  $\mu_{TRAV}$ )  
 233 were based on the content of government decisions regarding the use of public transport, determining the maximum number  
 234 of seats taken. The multipliers of the  $f$  parameter, which quantifies common-sense self-isolation and self-isolation resulting  
 235 from restrictions, were based on the assumption of increasing COVID-19 awareness in society and changes in penalties for  
 236 moving COVID-19-positive individuals in the public space. CR multipliers for the households ( $\mu_{HH}$ ), workplaces ( $\mu_{WP}$ ), and  
 237 street contexts ( $\mu_{STR}$ ) were adjusted with an educated guess, assuming that household CRs partly replaced those at workplaces,  
 238 education, or streets.

239 In the trial and error experiments, the minimum and maximum values of the multipliers related to the introduction of a given  
 240 restriction were first established in order to predict the course of the epidemic. Then, within the chosen range, several values of  
 241 multipliers were tested to compare the results with the real-world data of identified cases from 14 days after the introduced  
 242 change. Ten days is the minimum time needed to see the effect of the change in the number of confirmed cases in the model. It  
 243 results from the latent time (4 days) and the time assumed for the case to be reported (6 days). Additional four days allowed to  
 244 confirm changes in the trajectory. In order to determine the best set of multipliers, the Fréchet distance between the number of  
 245 confirmed cases from the model and from the real-world data was minimized.

246 The multipliers were estimated this way until the change on September 9, when schools were already opened. (In Poland,  
 247 schools were closed since March until the end of August. For the above procedure to work, a certain period when the schools  
 248 were open in real life was necessary to determine CRs of the schools context).

249 The final values of CR multipliers are listed in Table 3.

|            | $\mu_{HH}$ | $\mu_{KG}$ | $\mu_{SCH}$ | $\mu_{WP}$ | $\mu_{EU}$ | $\mu_{LEU}$ | $\mu_{COT}$ | $\mu_{STR}$ | $\mu_f$ | $\mu_{TRAV}$ |
|------------|------------|------------|-------------|------------|------------|-------------|-------------|-------------|---------|--------------|
| 05.03.2020 | 1.0        | 1.0        | 1.0         | 1.0        | 1.0        | 1.0         | 1.0         | 1.0         | 1.0     | 1.0          |
| 12.03.2020 | 1.005      | 0.7525     | 0.7525      | 0.9375     | 0.0        | 0.0         | 1.0         | 0.9375      | 0.8     | 1.0          |
| 14.03.2020 | 1.02       | 0.01       | 0.01        | 0.75       | 0.0        | 0.0         | 1.0         | 0.75        | 0.2     | 1.0          |
| 24.03.2020 | 1.03       | 0.01       | 0.01        | 0.35       | 0.0        | 0.0         | 0.25        | 0.35        | 0.1     | 0.75         |
| 01.04.2020 | 1.04       | 0.01       | 0.01        | 0.2        | 0.0        | 0.0         | 0.25        | 0.2         | 0.03    | 0.5          |
| 06.04.2020 | 1.04       | 0.0        | 0.0         | 0.2        | 0.0        | 0.0         | 0.25        | 0.2         | 0.03    | 0.5          |
| 11.04.2020 | 1.0425     | 0.0        | 0.0         | 0.2        | 0.0        | 0.0         | 0.25        | 0.175       | 0.03    | 0.5          |
| 16.04.2020 | 1.05       | 0.0        | 0.0         | 0.2        | 0.0        | 0.0         | 0.25        | 0.1         | 0.03    | 0.5          |
| 20.04.2020 | 1.05       | 0.0        | 0.0         | 0.2        | 0.0        | 0.0         | 0.25        | 0.2         | 0.03    | 0.5          |
| 06.05.2020 | 1.04       | 0.35       | 0.0         | 0.2        | 0.0        | 0.0         | 0.25        | 0.2         | 0.03    | 0.5          |
| 18.05.2020 | 1.04       | 0.35       | 0.05        | 0.21       | 0.0        | 0.0         | 0.25        | 0.21        | 0.03    | 0.55         |
| 30.05.2020 | 1.0192     | 0.35       | 0.05        | 0.21       | 0.0        | 0.0         | 0.25        | 0.2205      | 0.03    | 0.55         |
| 05.06.2020 | 1.0        | 0.35       | 0.05        | 0.2        | 0.0        | 0.0         | 0.25        | 0.1         | 0.03    | 0.55         |
| 28.06.2020 | 0.9875     | 0.2875     | 0.0         | 0.2        | 0.0        | 0.0         | 0.2875      | 0.2         | 0.035   | 0.6          |
| 03.07.2020 | 0.95       | 0.1        | 0.0         | 0.2        | 0.0        | 0.0         | 0.4         | 0.5         | 0.05    | 0.75         |
| 01.08.2020 | 0.95       | 0.2        | 0.0         | 0.2        | 0.0        | 0.0         | 0.3         | 0.3         | 0.05    | 0.75         |
| 03.09.2020 | 1.0        | 0.65       | 0.65        | 0.2        | 0.0        | 0.0         | 0.3         | 0.3         | 0.05    | 0.75         |
| 30.11.2020 | 1.0        | 0.65       | 0.0         | 0.2        | 0.0        | 0.0         | 0.3         | 0.1         | 0.05    | 0.75         |

Table 3

## 250 Supplementary materials

251 To show how the epidemic is spreading across the country, we present an example animation. It is a visualization of lock down  
 252 counties for example thresholds  $LET = LRT = 12$ .

## References

- 253
- 254 1. Rakowski, F., Gruziel, M., Łukasz Bieniasz-Krzywiec & Radomski, J. P. Influenza epidemic spread simulation for  
255 Poland — a large scale, individual based model study. *Phys. A: Stat. Mech. its Appl.* **389**, 3149 – 3165, DOI: <https://doi.org/10.1016/j.physa.2010.04.029> (2010).  
256
  - 257 2. UNESCO. Global monitoring of school closures. <https://en.unesco.org/covid19/educationresponse#schoolclosures> (2020).  
258 Accessed: 2021-04-14.
  - 259 3. Brauner, J. M. *et al.* Inferring the effectiveness of government interventions against COVID-19. *Science* DOI: <https://doi.org/10.1126/science.abd9338> (2020).  
260
  - 261 4. Aleman, D. M. *et al.* morPOP: a fast and granular agent-based model of COVID-19 to examine school mitigation strategies  
262 in newfoundland & labrador. In *Proceedings of the 30th Annual International Conference on Computer Science and*  
263 *Software Engineering, CASCON '20*, 266–267 (IBM Corp., 2020).
  - 264 5. Germann, T. C. *et al.* Using an agent-based model to assess k-12 school reopenings under different COVID-19 spread  
265 scenarios – united states, school year 2020/21. *medRxiv* DOI: [10.1101/2020.10.09.20208876](https://doi.org/10.1101/2020.10.09.20208876) (2020).
  - 266 6. Lazebnik, T. & Bunimovich-Mendrazitsky, S. The signature features of COVID-19 pandemic in a hybrid mathematical  
267 model - implications for optimal work-school lockdown policy. *medRxiv* DOI: [10.1101/2020.11.02.20224584](https://doi.org/10.1101/2020.11.02.20224584) (2020).
  - 268 7. McGee, R. S., Homburger, J. R., Williams, H. E., Bergstrom, C. T. & Zhou, A. Y. Model-driven mitigation measures for  
269 reopening schools during the COVID-19 pandemic. *medRxiv* DOI: [10.1101/2021.01.22.21250282](https://doi.org/10.1101/2021.01.22.21250282) (2021).
  - 270 8. Li, J. & Giabbanelli, P. J. Identifying synergistic interventions to address covid-19 using a large scale agent-based model.  
271 *medRxiv* DOI: [10.1101/2020.12.11.20247825](https://doi.org/10.1101/2020.12.11.20247825) (2020).
  - 272 9. Fung, I. C.-H. *et al.* Modeling the effect of school closures in a pandemic scenario: Exploring two different contact  
273 matrices. *Clin. Infect. Dis.* **60**, S58–S63, DOI: [10.1093/cid/civ086](https://doi.org/10.1093/cid/civ086) (2015).
  - 274 10. Milne, G. J., Kelso, J. K., Kelly, H. A., Huband, S. T. & McVernon, J. A small community model for the transmission of  
275 infectious diseases: Comparison of school closure as an intervention in individual-based models of an influenza pandemic.  
276 *PLOS ONE* **3**, e4005, DOI: [10.1371/journal.pone.0004005](https://doi.org/10.1371/journal.pone.0004005) (2008).
  - 277 11. Xue, Y., Kristiansen, I. S. & de Blasio, B. F. Dynamic modelling of costs and health consequences of school closure during  
278 an influenza pandemic. *BMC Public Heal.* **12**, 962, DOI: [10.1186/1471-2458-12-962](https://doi.org/10.1186/1471-2458-12-962) (2012).
  - 279 12. Towers, S., Geisse, K. V., Tsai, C.-C., Han, Q. & Feng, Z. The impact of school closures on pandemic influenza: Assessing  
280 potential repercussions using a seasonal SIR model. *Math. Biosci. & Eng.* **9**, 413–430, DOI: [10.3934/mbe.2012.9.413](https://doi.org/10.3934/mbe.2012.9.413)  
281 (2012).
  - 282 13. Cauchemez, S., Valleron, A.-J., Boëlle, P.-Y., Flahault, A. & Ferguson, N. M. Estimating the impact of school closure on  
283 influenza transmission from sentinel data. *Nature* **452**, 750–754, DOI: [10.1038/nature06732](https://doi.org/10.1038/nature06732) (2008).
  - 284 14. Hunter, E. & Kelleher, J. D. Using a hybrid agent-based and equation based model to test school closure policies during a  
285 measles outbreak. *BMC Public Heal.* **21**, 499, DOI: [10.1186/s12889-021-10513-5](https://doi.org/10.1186/s12889-021-10513-5) (2021).
  - 286 15. Abdollahi, E., Haworth-Brockman, M., Keynan, Y., Langley, J. M. & Moghadas, S. M. Simulating the effect of school  
287 closure during COVID-19 outbreaks in ontario, canada. *BMC Medicine* **18**, 230, DOI: [10.1186/s12916-020-01705-8](https://doi.org/10.1186/s12916-020-01705-8)  
288 (2020).
  - 289 16. Rakowski, F., Gruziel, M., Krych, M. & Radomski, J. P. Large scale daily contacts and mobility model — an individual-  
290 based countrywide simulation study for poland. *J. Artif. Soc. Soc. Simul.* **13**, DOI: <https://doi.org/10.18564/jasss.1529>  
291 (2010).
  - 292 17. Ahrenfeldt, L. J., Otavova, M., Christensen, K. & Lindahl-Jacobsen, R. Sex and age differences in COVID-19 mortality in  
293 europe. *Research Square* DOI: [10.21203/rs.3.rs-61444/v1](https://doi.org/10.21203/rs.3.rs-61444/v1) (2020).
  - 294 18. Du, R.-H. *et al.* Predictors of mortality for patients with COVID-19 pneumonia caused by SARS-CoV-2: a prospective  
295 cohort study. *Eur. Respir. J.* **55**, 2000524, DOI: [10.1183/13993003.00524-2020](https://doi.org/10.1183/13993003.00524-2020) (2020).
  - 296 19. Russell, T. W. *et al.* Estimating the infection and case fatality ratio for coronavirus disease (COVID-19) using age-adjusted  
297 data from the outbreak on the diamond princess cruise ship, february 2020. *Eurosurveillance* **25**, DOI: [10.2807/1560-7917.  
298 es.2020.25.12.2000256](https://doi.org/10.2807/1560-7917.es.2020.25.12.2000256) (2020).
  - 299 20. Ramakrishna, S., Górski, Ł. & Paschke, A. A dialogue between a lawyer and computer scientist: the evaluation of  
300 knowledge transformation from legal text to computer-readable format. *Appl. Artif. Intell.* **30**, 216–232 (2016).

- 301 **21.** Bracher, J. *et al.* A pre-registered short-term forecasting study of covid-19 in germany and poland during the second wave –  
302 publication approved by nature communications. *medRxiv* DOI: [10.1101/2020.12.24.20248826](https://doi.org/10.1101/2020.12.24.20248826) (2020).
- 303 **22.** Shahriari, B., Swersky, K., Wang, Z., Adams, R. P. & de Freitas, N. Taking the human out of the loop: A review of bayesian  
304 optimization. *Proc. IEEE* **104**, 148–175, DOI: [10.1109/jproc.2015.2494218](https://doi.org/10.1109/jproc.2015.2494218) (2016).

## 305 **Additional information**

### 306 **Competing interests** (mandatory statement).

307 Authors have no competing interests as defined by Nature Research, or other interests that might be perceived to influence  
308 the interpretation of the article.
